# Supplementary material for: Highly selective performance of rationally designed antimicrobial peptides based on ponericin-W1
Source: Royal Society of Chemistry journal article supplement (doi:10.1039/d2bm00744d), 2022-01-01
Supplement: d2bm00744d1.pdf [file d2bm00744d1.pdf]

## Supporting Information

### High Selective Performance of Rationally Designed Antimicrobial Peptides Based on Ponericin-W1

Songwei Lv<sup>1,3</sup>, Jingfang Wang<sup>1,3</sup>, Rongrong You<sup>1</sup>, Suyu Liu<sup>1,2</sup>, Yujie Ding<sup>1</sup>, Roja Hadianamrei<sup>2</sup>, Mhd Anas Tomeh<sup>2</sup>, Fang Pan<sup>1</sup>, Zhiqiang Cai<sup>1</sup>, and Xiubo Zhao<sup>1,2,\*</sup>

<sup>1</sup> School of Pharmacy, Changzhou University, Changzhou 213164, China

<sup>2</sup> Department of Chemical and Biological Engineering, University of Sheffield, Sheffield S1 3JD, UK

<sup>3</sup> These two authors contributed equally to this work.

\*Corresponding author. Email: xiubo.zhao@cczu.edu.cn

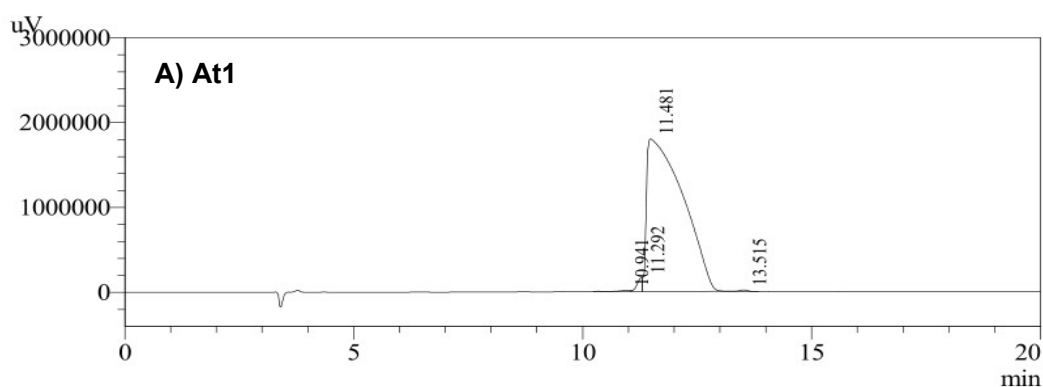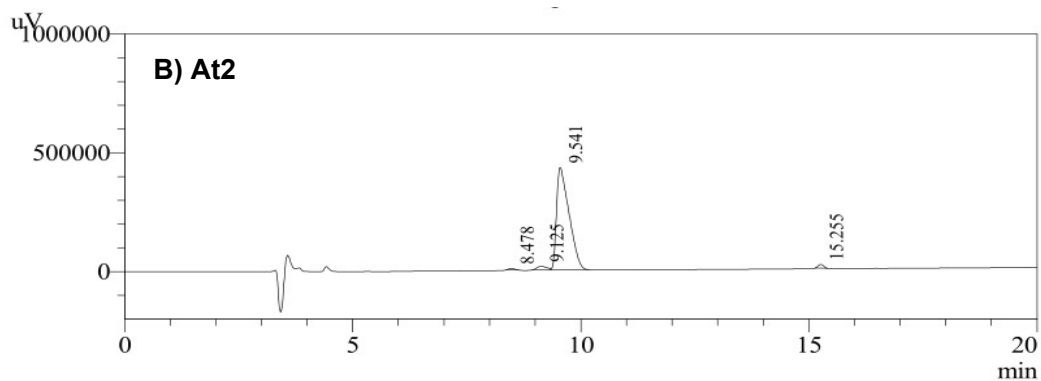

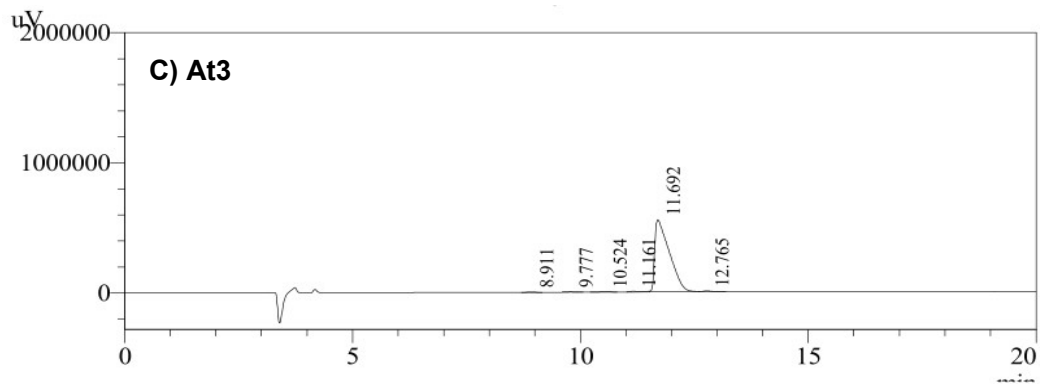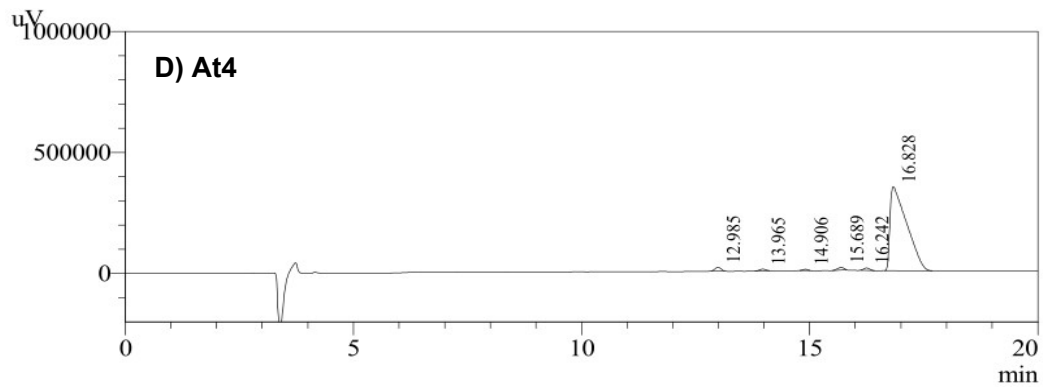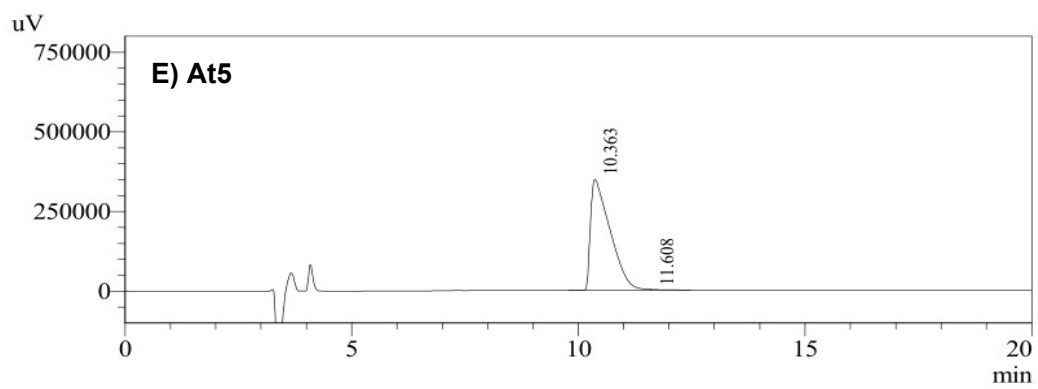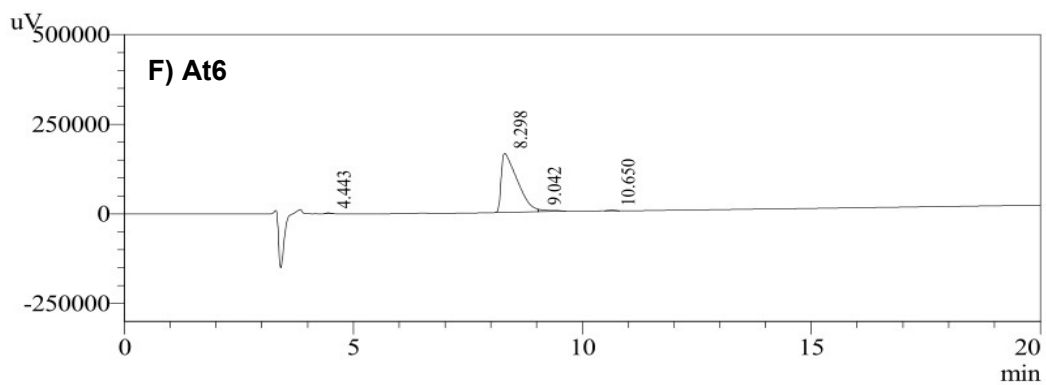

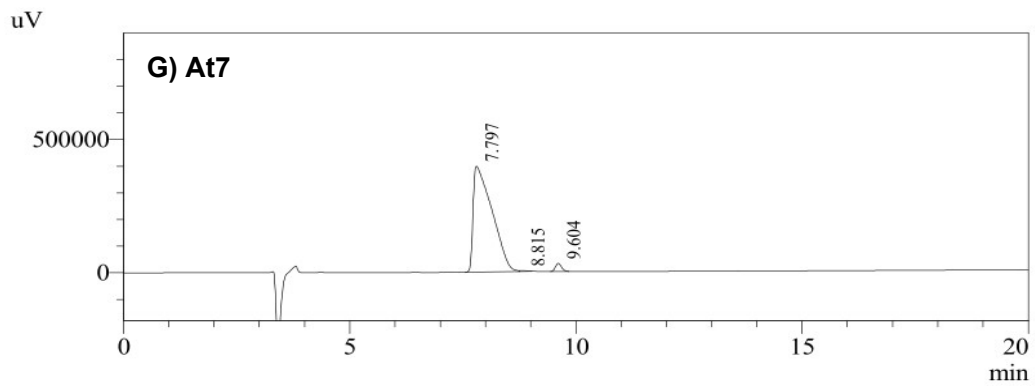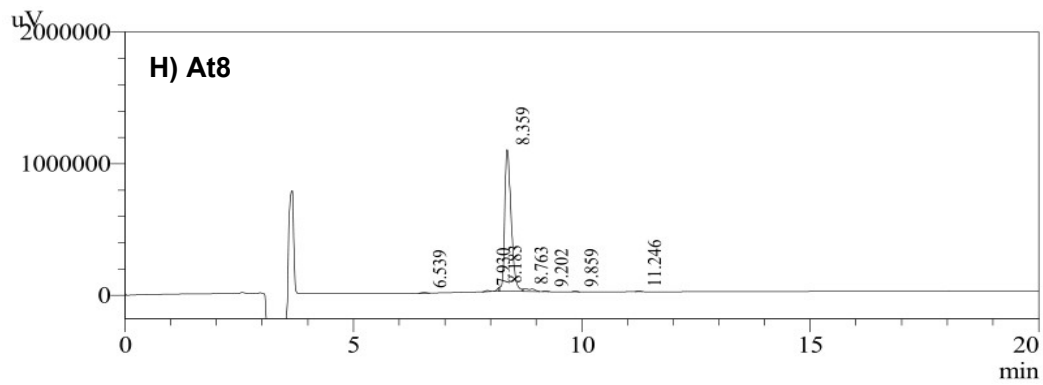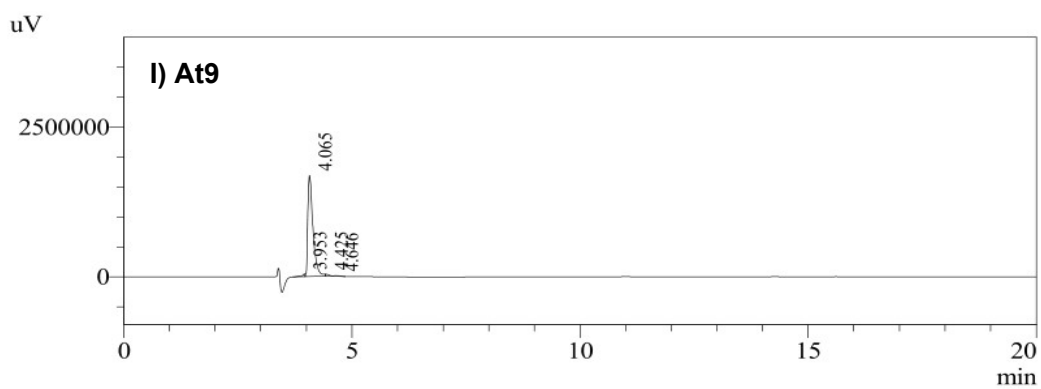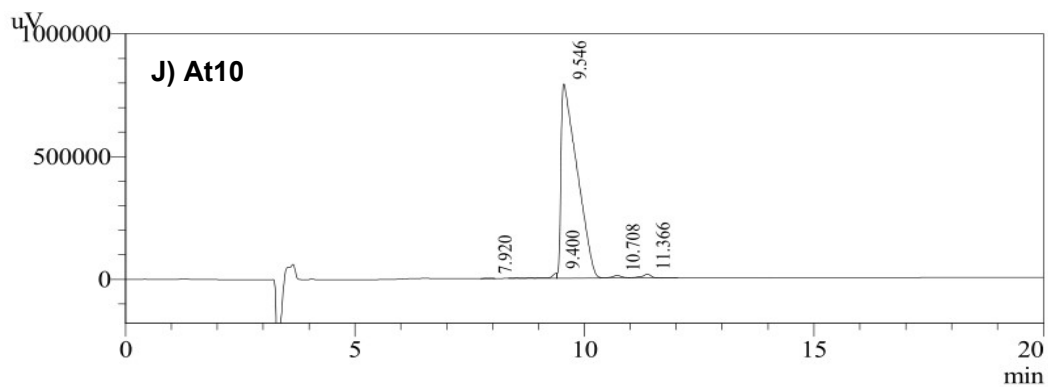

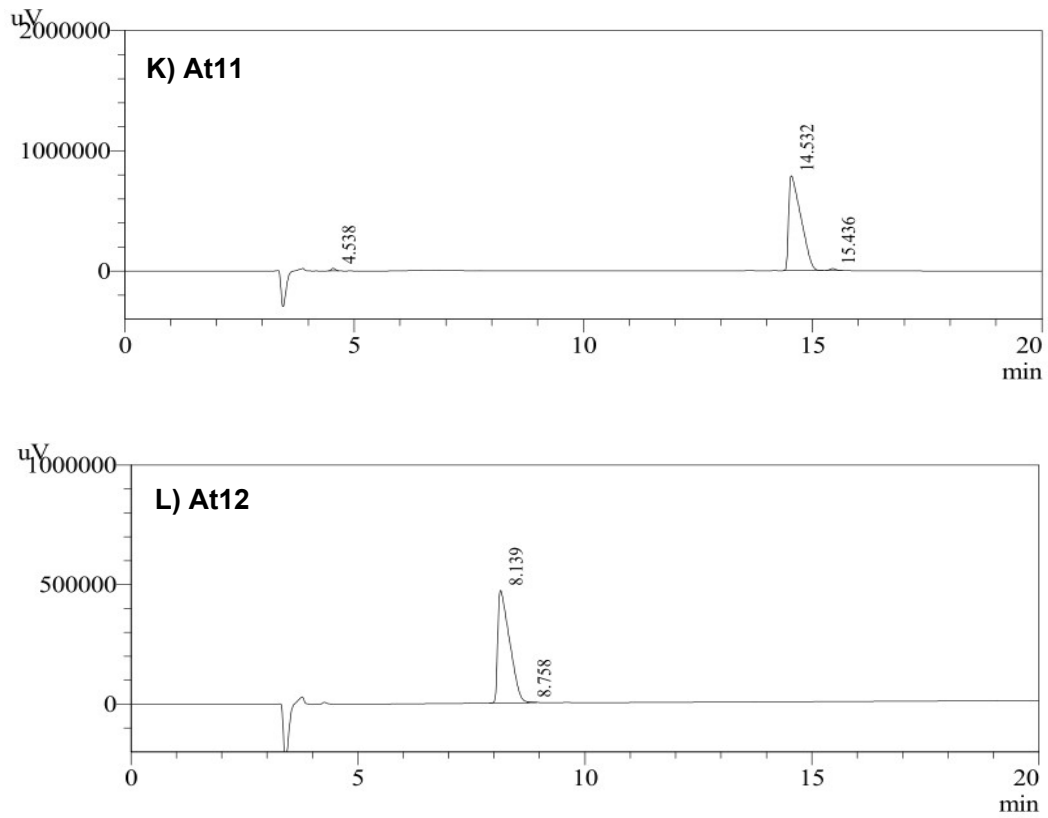

**Figure S1.** HPLC chromatograms of At1-At12 peptides. HPLC conditions: The peptide concentration was fixed at 1 mg/mL. Analytical column type: SHIMADZU Inertsil ODS-SP (4.6 x 250 mm x 5  $\mu$ m). Eluent A (0.1% trifluoroacetic in water) and eluent B (0.1% trifluoroacetic in acetonitrile). The flow rate was 1 mL/min and the UV detector was set at 214 nm.

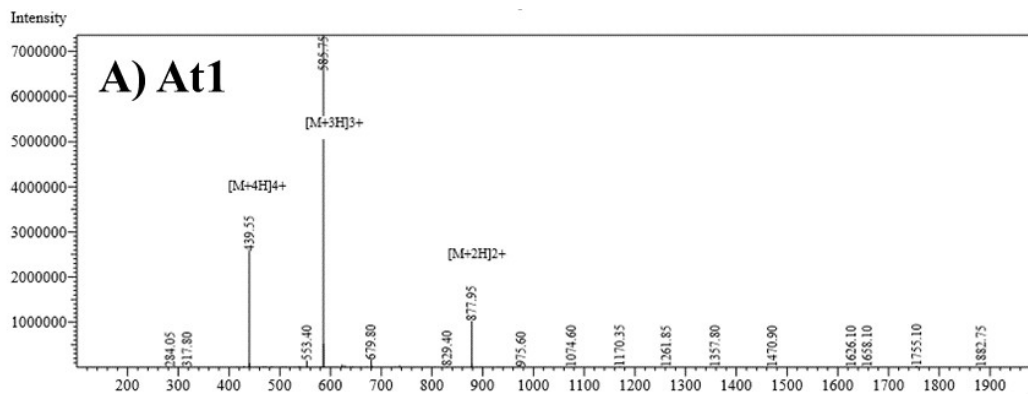

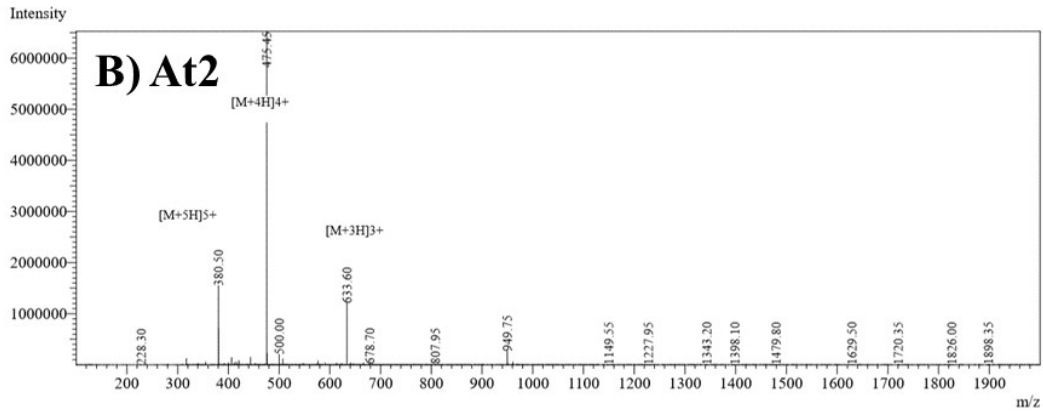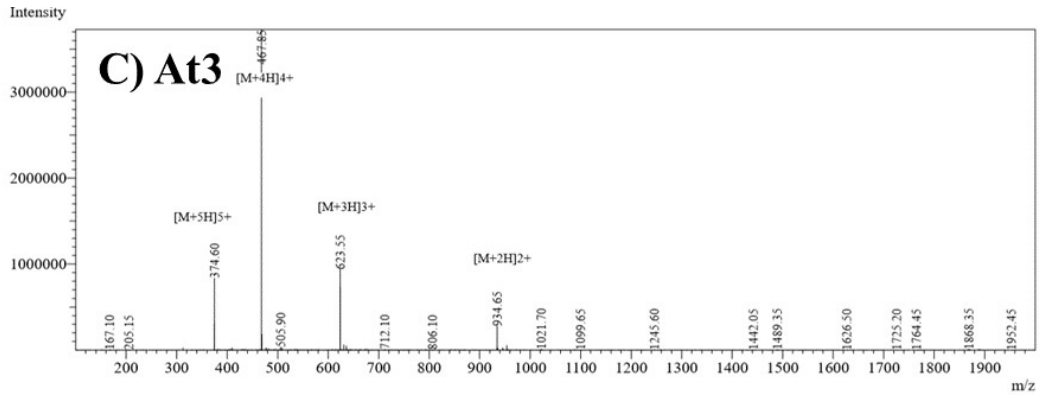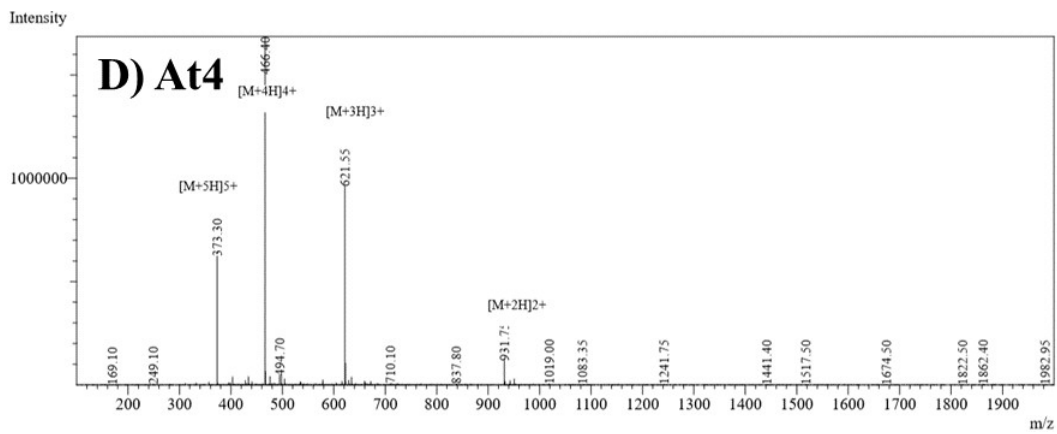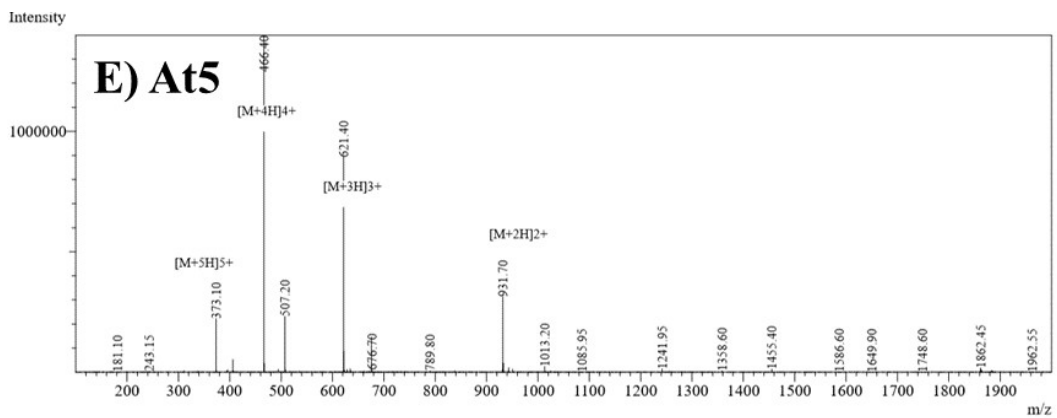

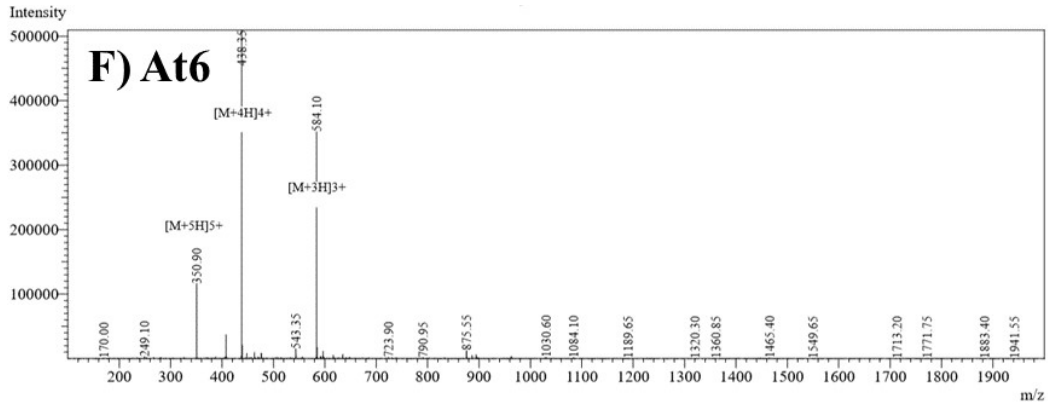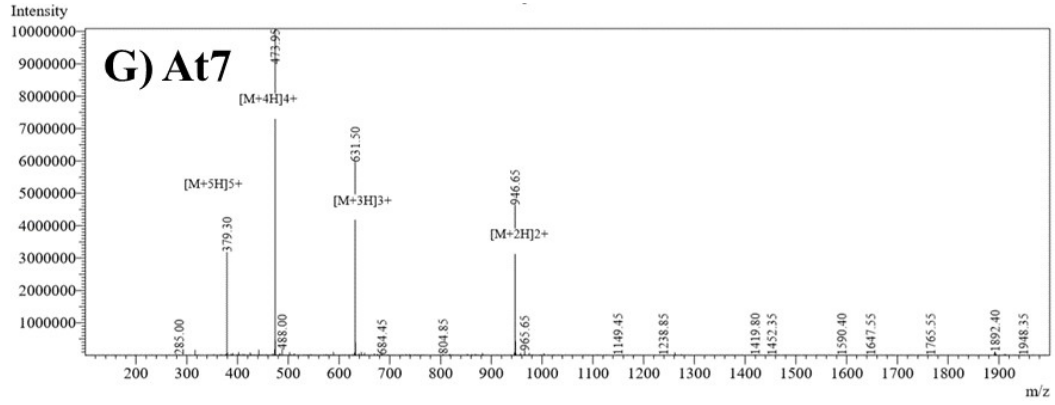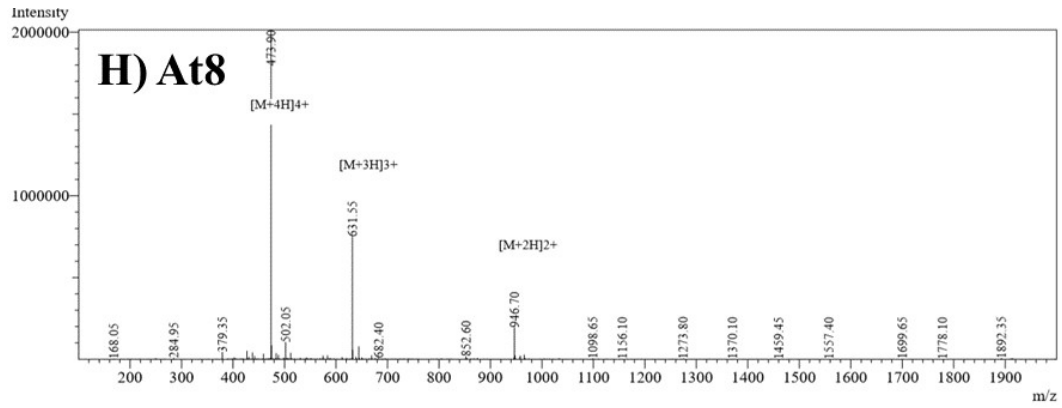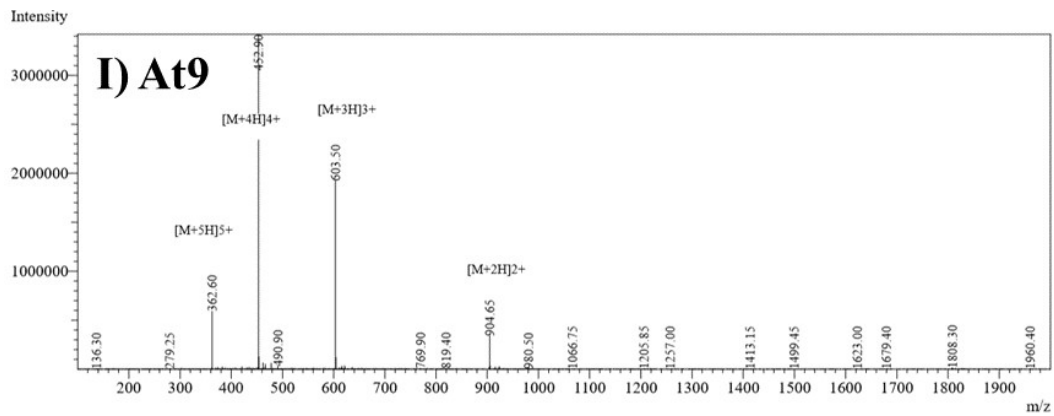

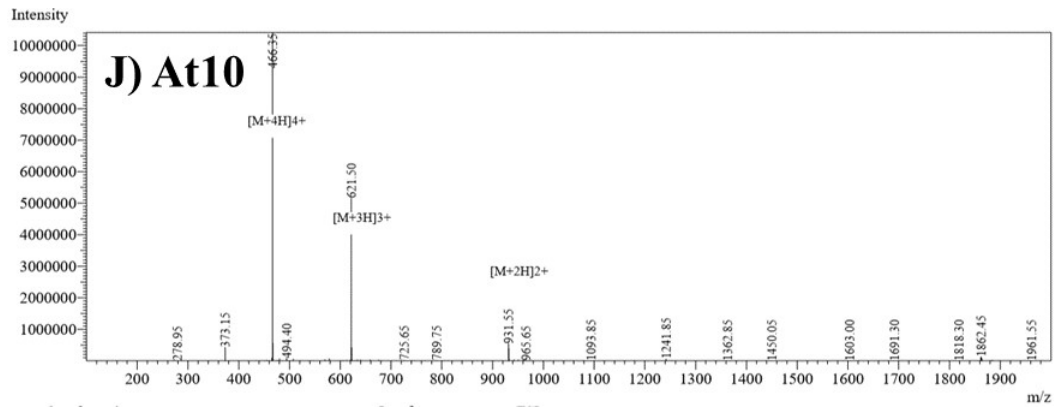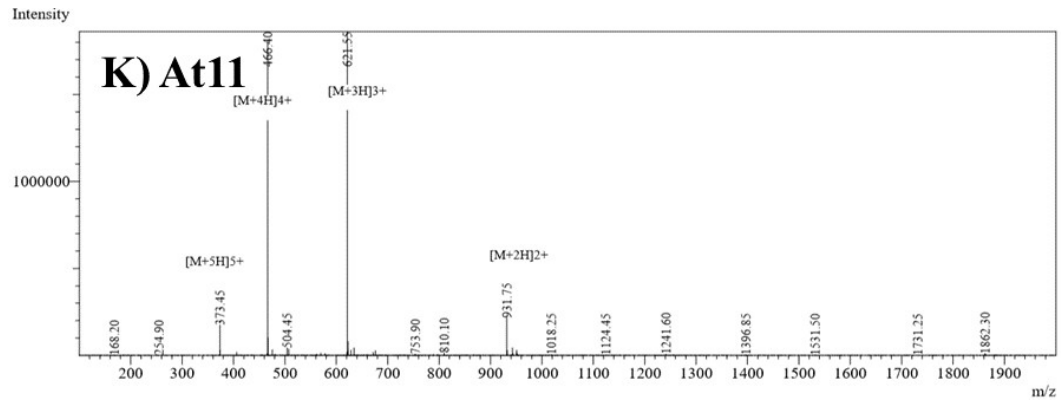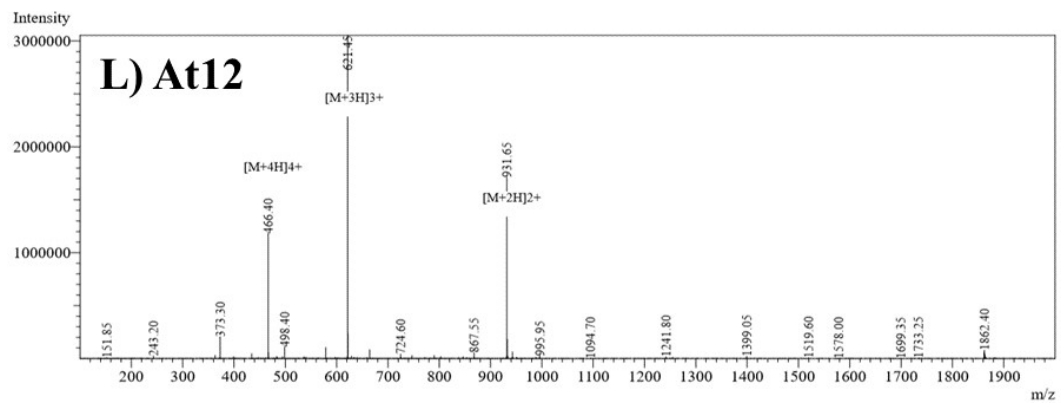

**Figure S2.** Mass spectrum of peptides.

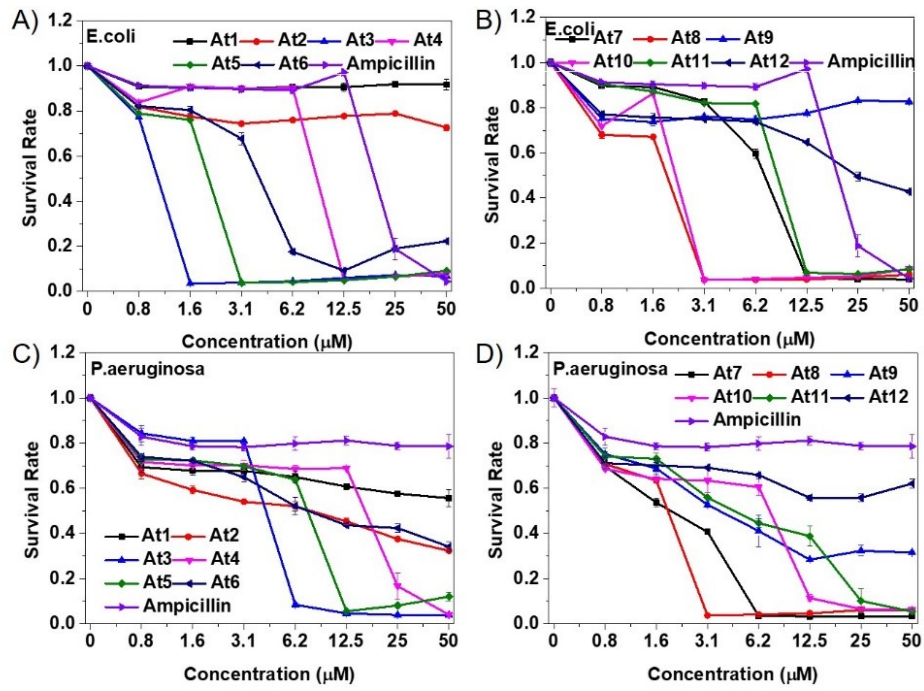

**Figure S3.** The MIC of antimicrobial peptides to gram-negative bacteria *E. coli* (A-B) and *P. aeruginosa* (C-D).

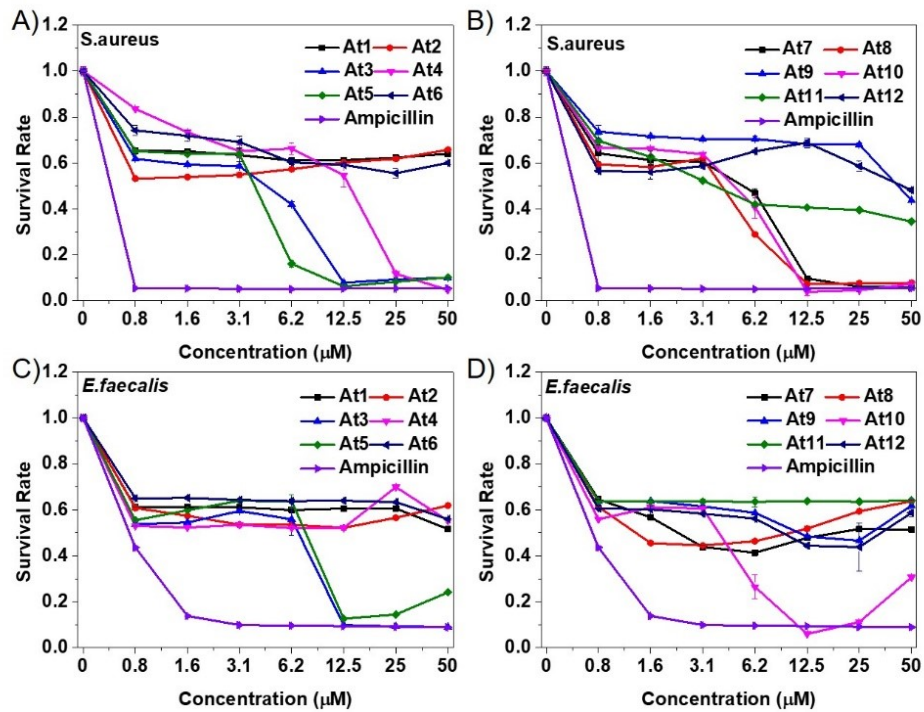

**Figure S4.** Bacteria The MIC of antimicrobial peptides to gram-positive bacteria *S. aureus* (A-B) and *E. faecalis* (C-D).



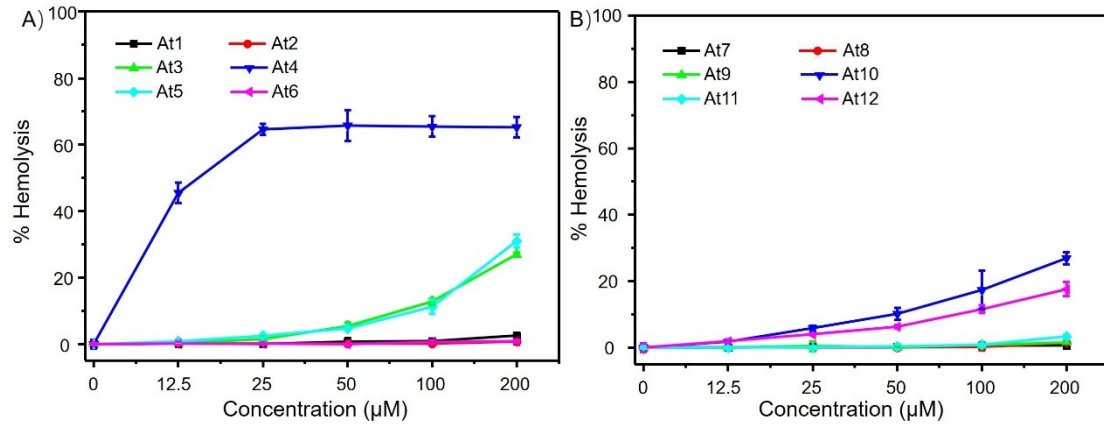

**Figure S5.** Hemolytic activities of peptides (At1-At12). Human red blood cells (hRBCs) were treated with different concentrations of peptides and incubated for 1 h at 37 °C. Then measure the absorbance at OD<sub>540nm</sub>.

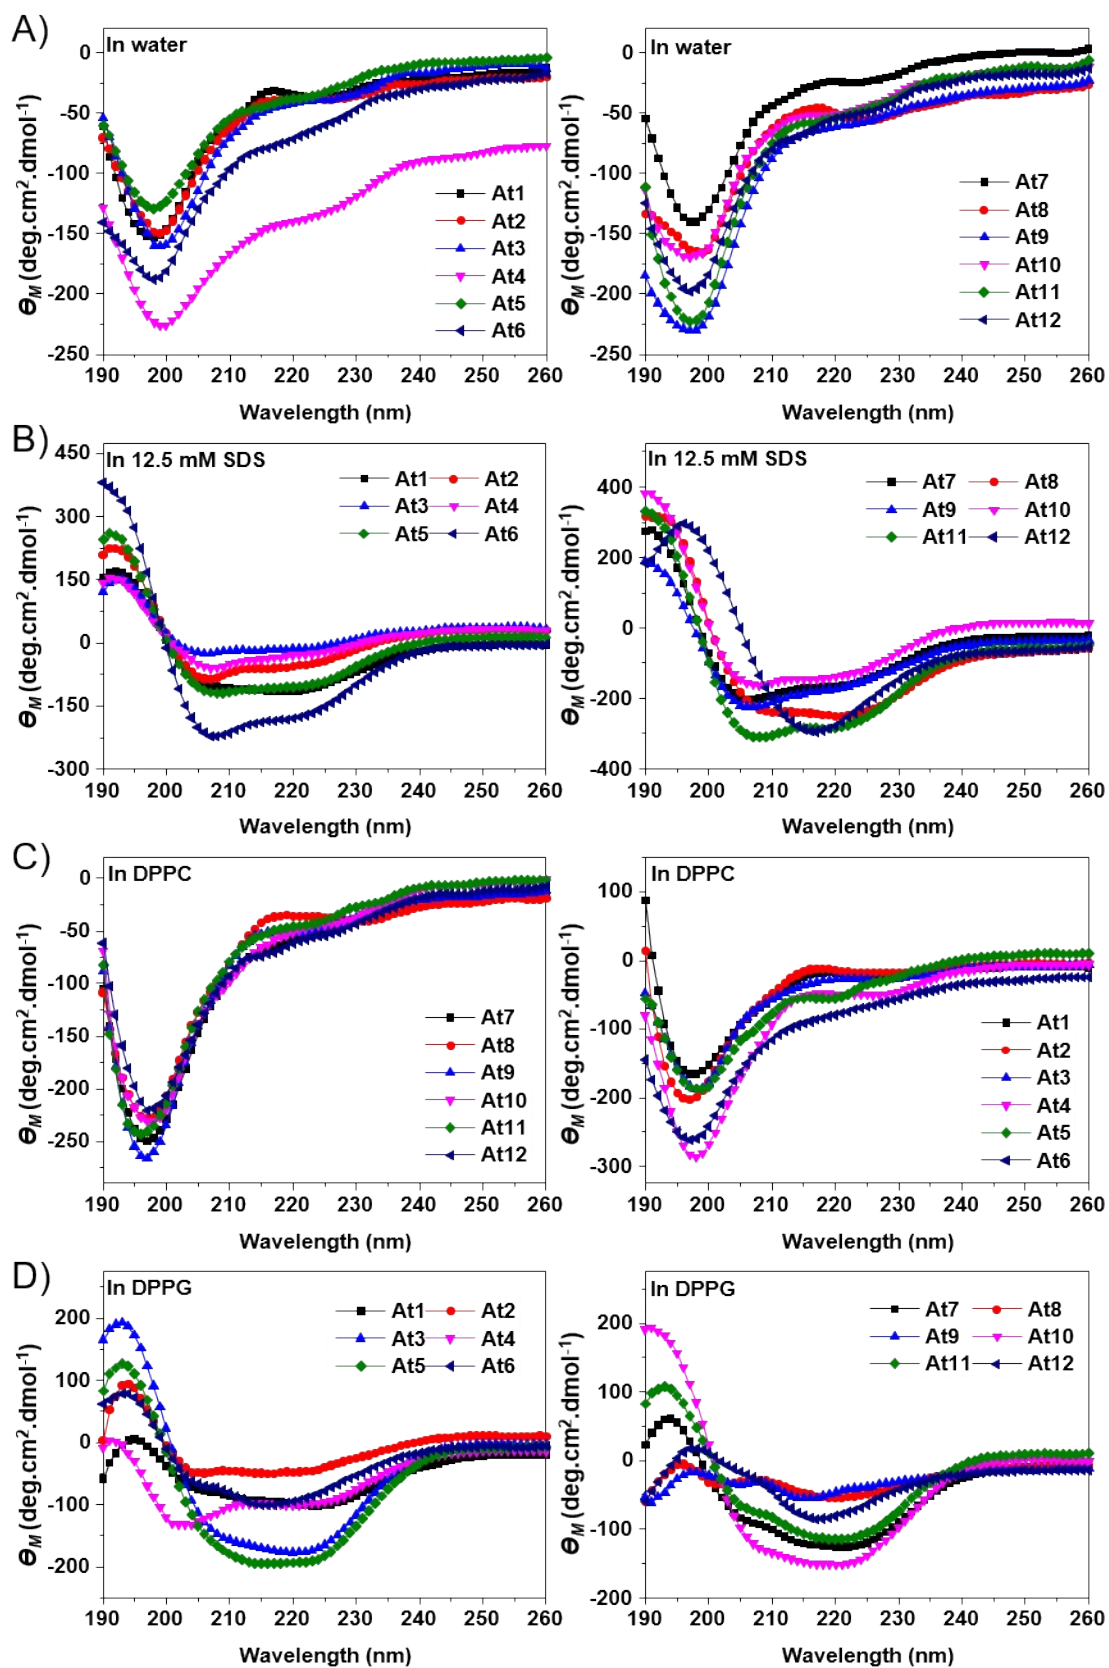

**Figure S6.** CD spectra of peptides in (A) water, (B) zwitterionic DPPC SUVs (0.25 mg/mL) solution, (C) 25 mM SDS and (D) negatively charged DPPG SUVs (0.25 mg/mL).

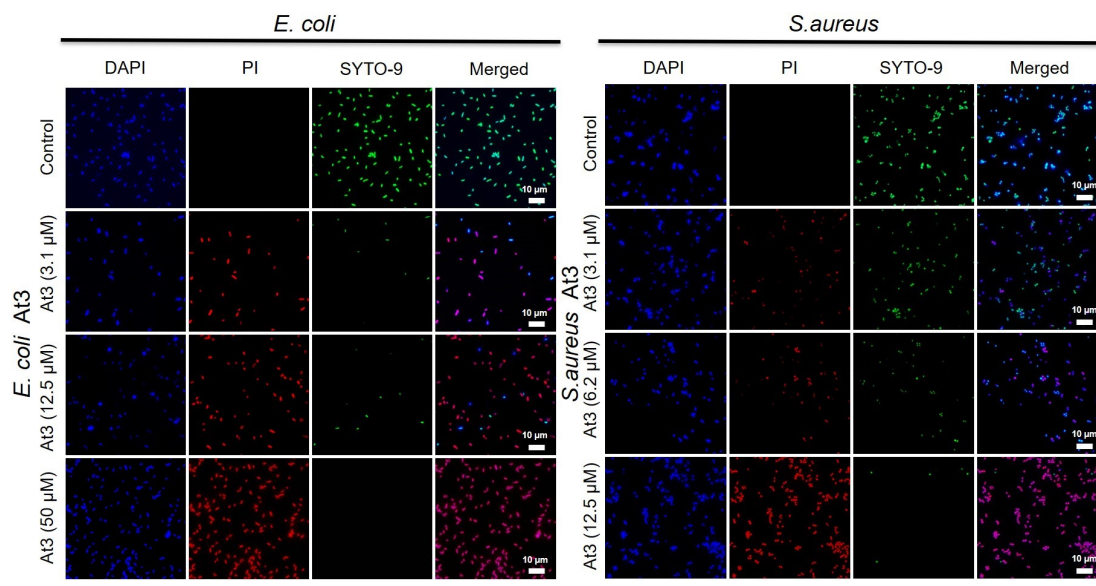

**Figure S7.** Live/Dead staining assay of *E. coli* and *S. aureus* before and after the treatment of At3 peptides at different concentrations for 2 h at 37 °C.

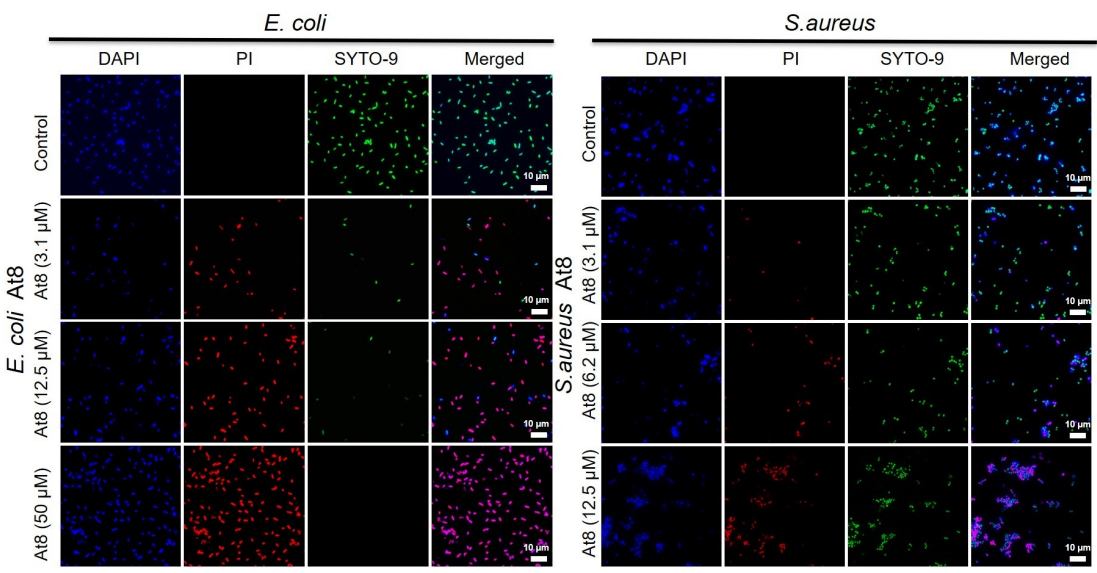

**Figure S8.** Live/Dead staining assay of *E. coli* and *S. aureus* before and after the treatment of At8 peptides at different concentrations for 2 h at 37 °C.

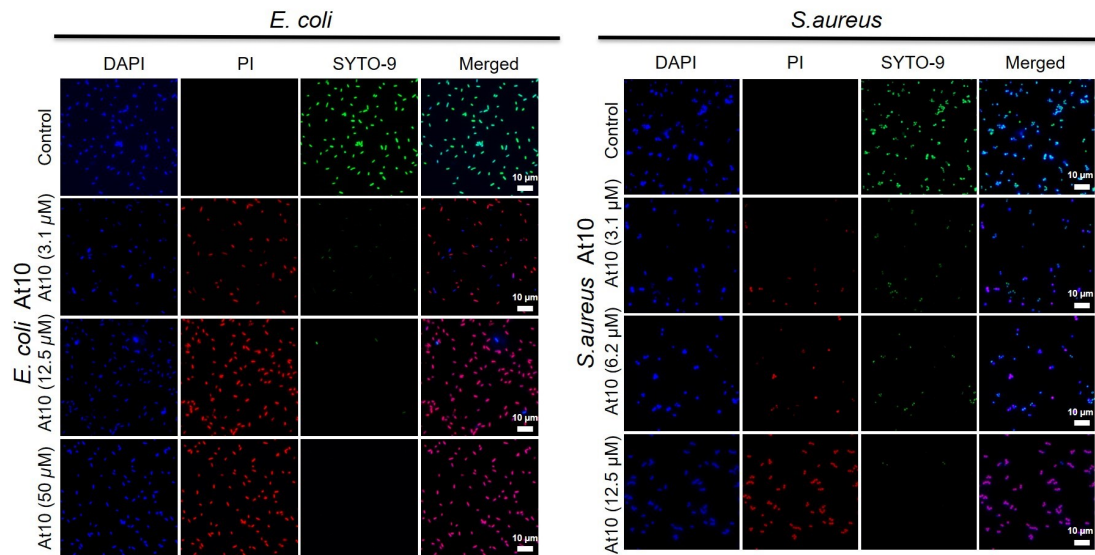

**Figure S9.** Live/Dead staining assay of *E. coli* and *S. aureus* before and after the treatment of At10 peptides at different concentrations for 2 h at 37 °C.

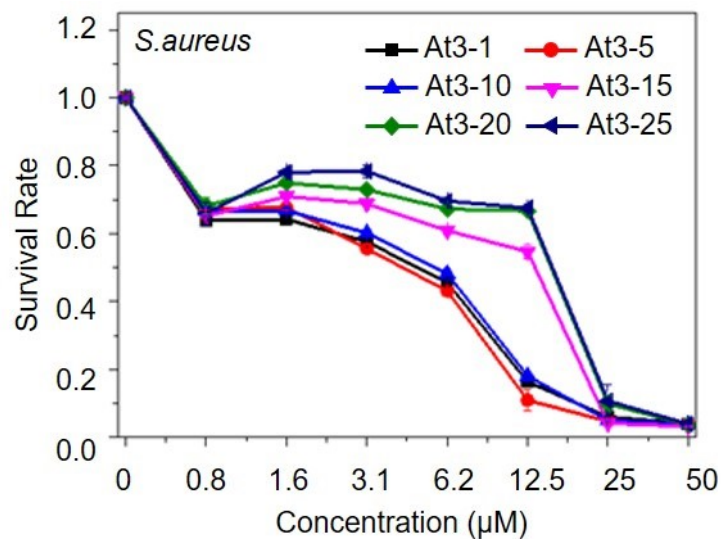

**Figure S10.** Development of antimicrobial resistance (AMR). *S. aureus* bacteria treated with At3 peptide (25 passages).
